# Supplementary material for: Catalyst-enhanced hydrothermal generation of highly pure compressed hydrogen gas from iron micro-powders
Source: Royal Society of Chemistry journal article supplement (doi:10.1039/c6ra19947j), 2016-01-01
Supplement: c6ra19947j1.pdf [file c6ra19947j1.pdf]

## Supporting Information

### Catalyst-enhanced hydrothermal generation of highly pure compressed hydrogen gas from iron micro-powders

Liang-Hsing Liu, Yu-Ching Tsai and Dong-Hwang Chen\*

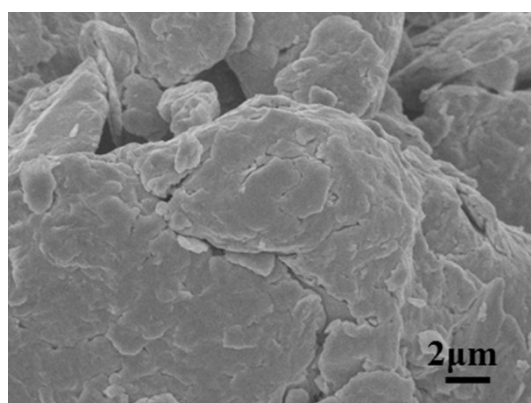

**Fig. S1** SEM image of iron powders before reaction.

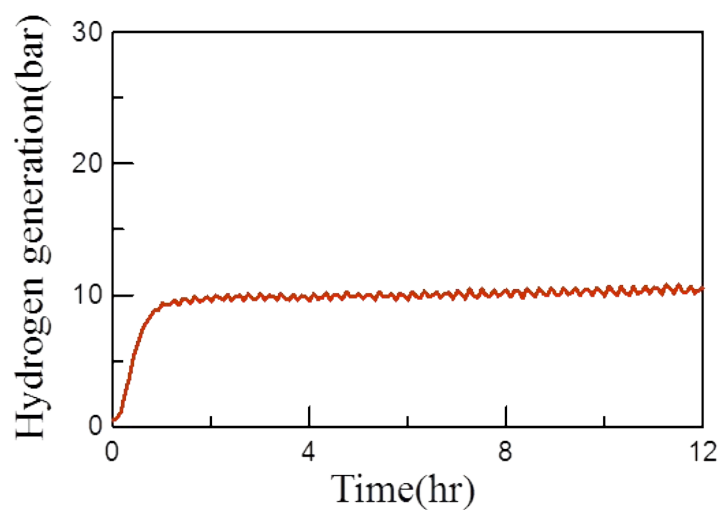

**Fig. S2** Variation of pressure with time during the hydrothermal generation of hydrogen gas at 120°C in 0.02 M NaCl solution.

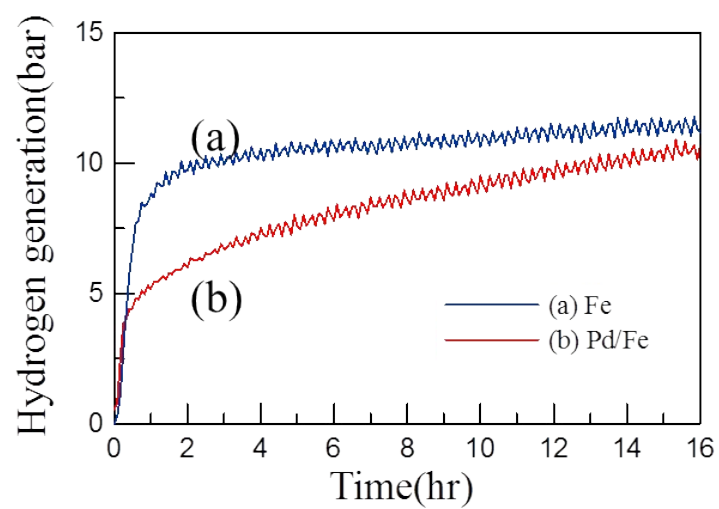

**Fig. S3** Variation of pressure with time during the hydrothermal generation of hydrogen gas by the iron powders with and without 1.0 mM PdCl<sub>2</sub> treatment at 120°C in the pure water.
